# Supplementary material for: MIRD Pamphlet No. 32: A MIRD Recovery Coefficient Model for Resolution Characterization and Shape-Specific Partial-Volume Correction
Source: HighWire-hosted journal article supplement (doi:10.2967/jnumed.124.268520), 2025-01-30
Supplement: 268520_Supplemental_Data.pdf [file 268520_Supplemental_Data.pdf]

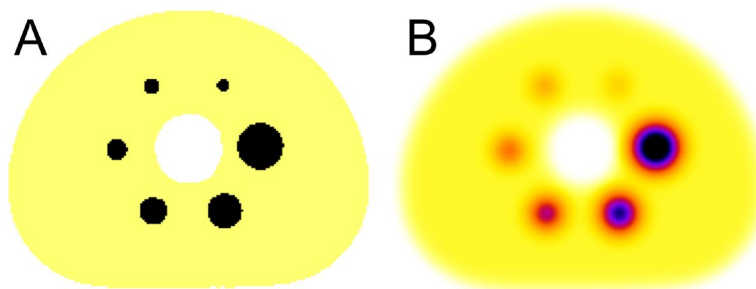

**Supplemental Figure 1:** A) National Electrical Manufacturers Association (NEMA) International Electrotechnical Commission (IEC) phantom digital reference object (DRO), and B) DRO convolved with a 3D Gaussian filter (18 mm full width at half maximum (FWHM)).

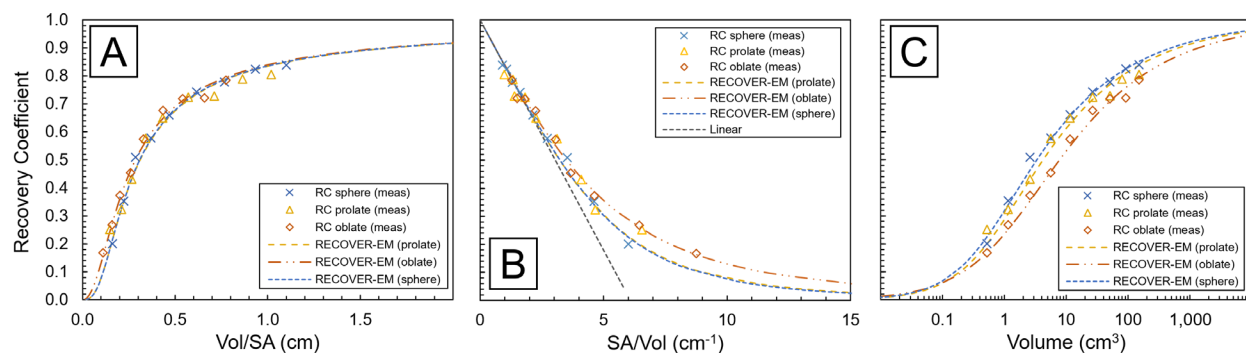

**Supplemental Figure 2:** <sup>99m</sup>Tc RC-curves generated with the RECOVER-EM model (Eq. 9) and the RC data for the various inserts. A) V/SA versus RC, B) SA/V versus RC, C) V versus RC. The markers represent measured data ("meas" is short for "measured").

**Supplemental Table 1:** Mean absolute difference (MAD) and minimum and maximum differences, for the RECOVER-EM and RECOVER-GM models compared to simulations. A spherical assumption is included for reference. RCs between 0.05-0.90 were included in the analysis. Sphericity is denoted by  $\psi$ .

|                  |        | RECOVER-EM    |          |              | RECOVER-GM    |          |          | Spherical Assumption (Eq. 4) |          |          |
|------------------|--------|---------------|----------|--------------|---------------|----------|----------|------------------------------|----------|----------|
| Shape (a,b,c)    | $\psi$ | MAD           | Max diff | Min Abs diff | MAD           | Max diff | Min diff | MAD                          | Max diff | Min diff |
| Prolate (1,1,2)  | 0.93   | <b>0.0016</b> | -0.0001  | -0.0051      | <b>0.0019</b> | 0.0029   | -0.0019  | <b>0.0162</b>                | 0.0275   | 0.0038   |
| Prolate (1,1,4)  | 0.79   | <b>0.0027</b> | 0.0012   | -0.0084      | <b>0.0054</b> | 0.0103   | -0.0024  | <b>0.0599</b>                | 0.0971   | 0.0113   |
| Prolate (1,1,8)  | 0.64   | <b>0.0042</b> | 0.0075   | -0.0065      | <b>0.0086</b> | 0.0177   | -0.0014  | <b>0.1191</b>                | 0.1848   | 0.0336   |
| Prolate (1,1,6)  | 0.51   | <b>0.0061</b> | 0.0135   | -0.0034      | <b>0.0116</b> | 0.0221   | -0.0007  | <b>0.1729</b>                | 0.2737   | 0.0483   |
| Oblate (2,2,1)   | 0.91   | <b>0.0009</b> | 0.0000   | -0.0025      | <b>0.0024</b> | 0.0037   | -0.0025  | <b>0.0187</b>                | 0.0315   | 0.0032   |
| Oblate (4,4,1)   | 0.70   | <b>0.0020</b> | 0.0015   | -0.0079      | <b>0.0083</b> | 0.0148   | -0.0037  | <b>0.0762</b>                | 0.1215   | 0.0122   |
| Oblate (8,8,1)   | 0.48   | <b>0.0050</b> | 0.0097   | -0.0123      | <b>0.0082</b> | 0.0273   | -0.0031  | <b>0.1121</b>                | 0.2440   | 0.0001   |
| Oblate (16,16,1) | 0.31   | <b>0.0088</b> | 0.0204   | -0.0143      | <b>0.0173</b> | 0.0372   | -0.0021  | <b>0.2157</b>                | 0.3681   | 0.0613   |

**Supplemental Table 2:** Simulated IEC phantom with sphere-to-background ratio (SBR) 8.8:1 and an 18 mm FWHM Gaussian filter applied. Resolution estimates obtained using the Resolution Equivalent Recovery Coefficient (RERC) equation (Eq. 12), the European Association of Nuclear Medicine EANM (2-parameter logistic (PL) function) equivalent, and a matched-filter analysis (MFA).  $RC_{meas}$  is the measured recovery coefficient.

| Sphere diameter $\phi$ (mm) | $RC_{meas}$ | $RC_{out}$ | 2-PL model FWHM (mm) | 3-PL model FWHM (mm) | Ground Truth FWHM (mm) |
|-----------------------------|-------------|------------|----------------------|----------------------|------------------------|
| 10                          | 0.17        | 0.06       | 27.2                 | 17.9                 | 18.0                   |
| 13                          | 0.21        | 0.11       | 23.7                 | 18.1                 | 18.0                   |
| 17                          | 0.28        | 0.19       | 20.5                 | 18.1                 | 18.0                   |
| 22                          | 0.38        | 0.30       | 18.4                 | 18.0                 | 18.0                   |
| 28                          | 0.48        | 0.41       | 17.4                 | 18.0                 | 18.0                   |
| 37                          | 0.59        | 0.53       | 17.0                 | 18.0                 | 18.0                   |
| Average RERC resolution:    |             |            | 20.7                 | 18.0                 |                        |
| Matched-Filter Analysis:    |             |            |                      | 18.0                 |                        |
